1 **Conserved collateral susceptibility networks in diverse**  
2 **clinical strains of *Escherichia coli*.**

3

4 Nicole L. Podnecky<sup>1\*</sup>, Elizabeth G. A. Fredheim<sup>1</sup>, Julia Kloos<sup>1</sup>, Vidar Sørum<sup>1</sup>, Raul  
5 Primicerio<sup>1</sup>, Adam P. Roberts<sup>2,3</sup>, Daniel E. Rozen<sup>4</sup>, Ørjan Samuelsen<sup>1,5</sup>, and Pål J.  
6 Johnsen<sup>1\*</sup>

7

8 <sup>1</sup> Department of Pharmacy, Faculty of Health Sciences, UiT The Arctic University of  
9 Norway, Tromsø, Norway; <sup>2</sup> Department of Parasitology and <sup>3</sup> Research Centre for Drugs  
10 and Diagnostics, Liverpool School of Tropical Medicine, Liverpool, UK; <sup>4</sup> Institute of  
11 Biology, Leiden University, Leiden, The Netherlands; <sup>5</sup> Norwegian National Advisory  
12 Unit on Detection of Antimicrobial Resistance, Department of Microbiology and  
13 Infection Control, University Hospital of North Norway, Tromsø, Norway.

14

15

16 \* Corresponding author:

17 UiT - The Arctic University of Norway

18 Department of Pharmacy

19 Faculty of Health Sciences

20 9037 Tromsø

21 Norway

22 [paal.johnsen@uit.no](mailto:paal.johnsen@uit.no)

23 [nicole.podnecky@uit.no](mailto:nicole.podnecky@uit.no)

## 24 **Abstract**

25 There is urgent need to develop novel treatment strategies to reduce antimicrobial  
26 resistance. Collateral sensitivity (CS), where resistance to one antimicrobial increases  
27 susceptibility to other drugs, is a uniquely promising strategy that enables selection  
28 against resistance during treatment. However, using CS-informed therapy depends on  
29 conserved CS networks across genetically diverse bacterial strains. We examined CS  
30 conservation in 10 clinical strains of *E. coli* resistant to four clinically relevant  
31 antibiotics. Collateral susceptibilities of these 40 resistant mutants were then determined  
32 against a panel of 16 antibiotics. Multivariate statistical analyses demonstrate that  
33 resistance mechanisms, in particular efflux-related mutations, as well as relative fitness  
34 were principal contributors to collateral changes. Moreover, collateral responses shifted  
35 the mutant selection window suggesting that CS-informed therapies could affect  
36 evolutionary trajectories of antimicrobial resistance. Our data allow optimism for CS-  
37 informed therapy and further suggest that early detection of resistance mechanisms is  
38 important to accurately predict collateral antimicrobial responses.

39

## 40 **Keywords**

41 Collateral sensitivity, cross-resistance, antimicrobial resistance, fitness cost of resistance,  
42 selection inversion

43

44

45 The evolution and increasing frequency of antimicrobial resistance (AMR) in bacterial  
46 populations is driven by the consumption and misuse of antimicrobials in human  
47 medicine, agriculture, and the environment (1-3). Historically, the threat of AMR was  
48 overcome by using novel antimicrobials with unique drug targets. However, the  
49 discovery rate of new antimicrobial agents has dwindled (4-6) and severely lags behind  
50 the rate of AMR evolution. While concerted scientific, corporate and political focus is  
51 needed to recover antimicrobial pipelines (7-9), there is an urgent need for alternative  
52 strategies that prolong the efficacy of existing antimicrobials and prevent or slow the  
53 emergence, spread and persistence of AMR. Current global efforts to improve  
54 antimicrobial stewardship largely focus on awareness and reducing overall consumption  
55 (8, 10-12). While these efforts will affect the evolution and spread of AMR, mounting  
56 evidence suggests that these changes alone will not lead to large-scale reductions in the  
57 occurrence of AMR (13-17).

58

59 Several recent studies have examined novel treatment strategies using multiple  
60 antimicrobials that could reduce the rate of resistance emergence and even reverse pre-  
61 existing AMR. These approaches, collectively termed “selection inversion” strategies,  
62 refer to cases where resistance becomes costly in the presence of other antimicrobial  
63 agents (18). Among the most promising of these strategies are those based on a  
64 phenomenon first reported in 1952 termed “collateral sensitivity” (CS), where resistance  
65 to one antimicrobial simultaneously increases the susceptibility to another (19). CS and  
66 its inverse, cross-resistance (CR), have been demonstrated for several bacterial species  
67 and across different classes of antimicrobials (20-26). These results have formed the

68 basis of proposed CS-informed antimicrobial strategies that mix drug pairs (21, 27) or  
69 alter temporal administration, e.g. drug cycling (20, 28). The notion behind these  
70 strategies is that they would force bacteria to evolve AMR along a predictable trajectory  
71 that results in CS; this predictability can then be exploited to ultimately reverse resistance  
72 and prevent the fixation of AMR and multi-drug resistance development at the population  
73 level of bacterial communities.

74

75 Initial *in vitro* experiments support using CS-based strategies to re-sensitize resistant  
76 strains (20) and reduce rates of resistance development (28); however, the broader  
77 application of this principle depends on predictable bacterial responses during  
78 antimicrobial therapy. This predictability must be general for a given drug class and  
79 should not vary across strains of the same species. To date, most studies of CS and CR  
80 have focused on describing these responses as collateral networks using resistant mutants  
81 derived from single laboratory adapted strains and few exemplary clinical isolates. Two  
82 studies on *Pseudomonas aeruginosa* have further investigated CS in collections of  
83 clinical isolates (29, 30). However, these studies lack either proper baseline controls (29)  
84 or sufficient genetic diversity (30). As valuable as previous studies have been, the  
85 responses of single strains (laboratory or clinical) may not be representative of CS and  
86 CR evolution in other strains. To address this limitation, we focused on understanding  
87 collateral networks in clinical urinary tract infection isolates of *Escherichia coli* with  
88 selected resistance to drugs widely used for the treatment of urinary tract infections;  
89 ciprofloxacin (CIP), trimethoprim (TMP), nitrofurantoin (NIT), or mecillinam (MEC).

90

91 We investigated the collateral networks to 16 antimicrobials from diverse drug classes in  
92 10 genetically diverse clinical strains (corresponding to 40 laboratory-generated AMR  
93 mutants) to assess the factors contributing to collateral responses (both CS and CR). This  
94 approach allowed us to identify variation in the sign and magnitude of collateral  
95 responses and identify mechanisms of CS and CR that are preserved in different genetic  
96 backgrounds. By using multivariate statistical modeling of experimental data, we show  
97 that resistance mutations, particularly those affecting efflux pumps, and the relative  
98 fitness of resistant isolates are more important determinants of the structure of collateral  
99 networks than genetic background. Our results support the idea that collateral responses  
100 may be predictable.

101

## 102 **Results**

### 103 **Collateral responses are frequent and vary both between and across AMR groups.**

104 Starting from 10 pan-susceptible urinary tract clinical *E. coli* isolates (**Fig. S1**) (31), a  
105 single AMR mutant was generated to each of four individual antimicrobials used for  
106 urinary tract infections treatment, CIP, TMP, NIT, and MEC. Here we define ‘AMR  
107 group’ as the collection of mutants from the 10 different genetic backgrounds that were  
108 selected for resistance to the same antimicrobial. In total 40 AMR mutants were  
109 generated that had resistance levels above clinical breakpoints, as determined by  
110 antimicrobial susceptibility testing using both gradient strip diffusion (**Table S1**) and  
111 inhibitory concentration 90% (IC<sub>90</sub>; (20)) testing (**Table 1**). Changes in the IC<sub>90</sub> of AMR  
112 mutants from each respective wild-type (WT) strain (**Fig. S2**) were compared for 16  
113 antimicrobials (**Table 2**). The two methods are correlated but IC<sub>90</sub> measurements allow

114 for more robust detections of small relative differences in susceptibility (32, 33). Overall,  
115 collateral responses were observed in 40.5% (243/600) of possible instances (**Table S2**);  
116 of these, roughly half, 47% (115/243), were associated with only a 1.5 and 2-fold change  
117 in  $IC_{90}$ . Such small changes would not be observed by typical 2-fold antimicrobial  
118 susceptibility testing methods frequently used in clinical laboratories.

119

120 Overall CR was more frequent than CS, 151 versus 92 instances (**Table S2**), and  
121 collateral networks varied considerably between AMR groups. We observed 20 cases of  
122 conserved collateral responses (**Fig. 1**), where CR or CS to a specific antimicrobial was  
123 found in  $\geq 50\%$  of the mutants within an AMR group, defined as  $CR_{50}$  or  $CS_{50}$   
124 respectively. This indicates that some collateral responses are likely general, irrespective  
125 of genetic background. For each  $CS_{50}$  and  $CR_{50}$  observation,  $IC_{90}$  results were further  
126 assessed by generating dose response curves of representative strain:drug combinations  
127 (**Fig. S3**). Inhibition of growth was shown to vary across antimicrobial concentrations  
128 between AMR mutants and respective WT strains, confirming the changes in  
129 antimicrobial susceptibility determined by the  $IC_{90}$  assays. While conserved collateral  
130 responses were observed, there was variability across the remaining genetic backgrounds.

131

132 During the selection of AMR mutants, we often observed conspicuous changes to colony  
133 size for all AMR groups, suggesting that resistant mutants had reduced bacterial fitness.  
134 To test this, we measured the growth rates of AMR mutants and compared these to the  
135 respective WT strains (**Fig. S4**). In general,  $CIP^R$  and  $MEC^R$  mutants displayed severely  
136 reduced growth rates suggesting high costs of resistance. The cost of  $CIP^R$  and  $MEC^R$

137 mutants, measured as relative growth rate, was significantly different from 1 and varied  
138 between 0.34 and 0.75 with a mean of 0.53 for all CIP<sup>R</sup> mutants, whereas the cost of  
139 MEC<sup>R</sup> mutants varied between 0.49 and 0.79 with a mean of 0.64. NIT<sup>R</sup> and TMP<sup>R</sup>  
140 mutants displayed lower levels of reduced fitness and several resistant mutants harbored  
141 apparent cost-free resistance mutations (**Fig. S4**). Only two of ten NIT<sup>R</sup> mutants and four  
142 of ten TMP<sup>R</sup> mutants displayed a significant cost of resistance. Relative growth rates  
143 varied between 0.93 and 1.05 and 0.68 and 1.07 with averages of 0.99 and 0.94 for NIT<sup>R</sup>  
144 and TMP<sup>R</sup> mutants, respectively.

145

146 **Conserved collateral responses were primarily found in CIP<sup>R</sup> mutants.** Nearly half  
147 (108/243, 44%) of the observed collateral responses were in CIP<sup>R</sup> mutants, while the  
148 remaining 135 were distributed between the other three AMR groups (**Table S2**). Within  
149 the CIP<sup>R</sup> group, the majority of collateral responses were CR (70/108, 64.8%).

150 Additionally, CS responses found for the CIP<sup>R</sup> mutants were the most conserved in our  
151 dataset, with CS to GEN occurring in 8 of 10 strains and CS to FOS in 7 of 10 strains.

152 GEN and other aminoglycosides are important for the treatment of a wide range of  
153 hospital infections (34), while FOS is primarily used for treatment of uncomplicated  
154 urinary tract infections (35, 36). The CIP<sup>R</sup> mutants were also unique in the magnitude of  
155 observed changes, with cases of CR close to 30-fold and CS as high as 6-fold changes in  
156 IC<sub>90</sub> (**Fig. S2**). Only CIP<sup>R</sup> isolates displayed potential clinically relevant CR, where six  
157 strains had IC<sub>90</sub> values above the clinical breakpoint for resistance to CHL and a single  
158 strain (K56-68 CIP<sup>R</sup>) was above the AMX breakpoint.

159

160 **Characterization of AMR mutants.** We hypothesized that CS and CR variation in and  
161 between the AMR groups could be attributed to mutations causing resistance in each  
162 strain. Using whole genome sequencing we identified a total of 150 mutations in the  
163 AMR mutants (**Table S3**). Of these, 88 mutations affect previously described or putative  
164 AMR associated genes, gene regions, or pathways (**Table S3**). The remaining mutations  
165 were found in other cellular processes with no known association to antimicrobial  
166 resistance (*e.g.* metabolic pathways and virulence factors), such as mutation to the FimE  
167 regulator of FimA that was frequently observed in MEC<sup>R</sup> mutants (**Table S3**). Aside  
168 from FimE, we did not observe similar mutations in non-AMR associated regions across  
169 strains of the same AMR group (parallel evolution), suggesting that such mutations had  
170 limited, if any effect on collateral responses in this study. For each of the 40 AMR  
171 mutants at least one putative resistance mechanism was identified, including mutations to  
172 previously described antimicrobial drug targets and promoters of drug targets, drug  
173 modifying (activating) enzymes, regulators of efflux pumps, RNA polymerases and  
174 mutations to other metabolic and biochemical processes that may contribute to resistance  
175 (**Table 3**). Briefly, all but one CIP<sup>R</sup> mutant contained mutations in *gyrA* and efflux  
176 regulatory genes and gene-regions likely affecting efflux expression (*acrAB* and/or  
177 *mdtK*), while one strain had only drug target mutations and displayed the well-described  
178 GyrA (S83L) and ParC (G78D) mutation combination. Both efflux and drug target  
179 mutations are frequently found in surveys of clinical isolates (37-40). NIT<sup>R</sup> mutants had  
180 mutations in one or both nitro-reductases (*nfsA*, *nfsB*) and the majority of strains had  
181 additional mutations in *mprA* that encodes an efflux regulator of EmrAB-TolC pump  
182 expression. TMP<sup>R</sup> mutants contained mutations either in *folA* and/or its promoter or



183 genetic amplification of a large genetic region containing *folA*. MEC<sup>R</sup> mutants are unique  
184 in that they were evolved as single step mutants, where a single mutation could confer  
185 clinically relevant resistance to MEC. Resistance development for the remaining three  
186 drugs required several steps, as multiple mutations were required for resistance above  
187 clinical breakpoints. In total 12 different mutations in genes and/or cellular processes  
188 previously linked to MEC<sup>R</sup> were identified in the MEC<sup>R</sup> group (41).

189

190 Our data suggest that the few collateral responses in TMP<sup>R</sup> mutants are attributable to a  
191 specific mechanism of resistance affecting a single unique drug target (*i.e.*  
192 overexpression/alteration of Fola). Similarly, the CIP<sup>R</sup> group displayed a clear trend  
193 where conserved CR responses were strongly linked to mutations in efflux regulatory  
194 regions. In the remaining AMR groups we observed heterogeneous collateral responses.

195

196 The WT genomes were evaluated for the presence of genetic elements linked to  
197 AMR. We detected only one acquired genetic element, *suI2* (linked to sulfonamide  
198 resistance) in K56-44, and two point mutations, PmrB V161G in K56-50 and K56-70  
199 and ParE D475E in K56-78, that are linked to COL and quinolone (CIP) resistance,  
200 respectively (**Table S3E**). It is unclear what, if any, effect these resistance determinants  
201 have in these WT strains since all were phenotypically pan-susceptible (**Fig. S1**).

202 However, the ParE mutation could contribute to CIP<sup>R</sup> levels in K56-78, as the K56-78  
203 WT was among the higher WT values for CIP (0.015 µg/mL) (**Fig. S1**) and K56-78 CIP<sup>R</sup>  
204 was among the highest IC<sub>90</sub> values of the CIP<sup>R</sup> mutants (**Table 1**).

205

206 **Multivariate statistical analyses suggest that efflux-related mutations and relative**  
207 **fitness are significant contributors to collateral responses.** Multivariate statistical  
208 approaches were used to investigate the extent to which genetic (strain) background,  
209 AMR group, the putative mechanism of resistance in particular efflux-related mutations  
210 (**Table S3**), growth rate and the fitness cost of resistance explain the total variation in  
211 collateral responses. All the above factors were investigated individually and the related  
212 models are found in the supplementary material (**Fig. S5A**). Throughout the remaining  
213 analyses we focus mainly on efflux-related mutations rather than AMR group to  
214 explicitly address putative mechanisms of resistance and on relative fitness rather than  
215 the growth rate. We estimated several models with individual, or a combination of,  
216 factors to assess their effect size and significance given some level of co-linearity  
217 between fitness and efflux type (**Fig 2, Fig. S5C-F**). A model including strain  
218 background, relative fitness and efflux-related mutations as factors explained 62.53% of  
219 the total variation in  $IC_{90}$  values (**Fig. 2A, Table S4**). In this three-factor model there  
220 was clear separation of the mutants by AMR group. The  $CIP^R$  mutants showed strong  
221 CR towards TEM, CHL, CAZ and AMX separating this AMR group from the others  
222 along the first ordination axis. Along the second ordination axis,  $MEC^R$  isolates were  
223 distinct, had CR to TEM, and were more likely to have CS towards drugs such as AZT  
224 and CHL (**Fig. 2A**). Both efflux type and relative fitness were significant predictors  
225 when tested alone and in combination (**Table S4**). The model (**Fig. 2A**) also revealed that  
226 strain background had a limited, non-significant contribution. Even when modeled alone  
227 (**Fig. S5A**), strain background only accounted for 6.53% of the variation and was non-  
228 significant (**Table S4**).

229

230 We initially hypothesized that genetic background would significantly affect collateral  
231 responses. Our data suggest that it does not. Arguably, the inclusion of IC<sub>90</sub> data from the  
232 drugs to which primary resistance was selected for could confound the analysis, despite  
233 our efforts to minimize these effects using log transformed data. We used the same  
234 approaches to assess a subset of collateral responses, excluding data for all of the 40  
235 AMR mutants to five antimicrobials containing the drugs used for selection (CIP, MEC,  
236 NIT, TMP) and SXT. Within the subset model, patterns consistent with the full model  
237 were observed, but with a lower degree of clustering by AMR group (**Fig. 2B**). For  
238 example, the K56-2 CIP<sup>R</sup> mutant is now co-localized with the MEC<sup>R</sup> isolates, indicating  
239 that this isolate is distinct from other CIP<sup>R</sup> mutants, which still showed strong tendencies  
240 of CR to TEM, CHL, CAZ and AMX. Despite these changes, efflux type and fitness  
241 were still significant predictors of collateral networks, whereas strain background  
242 remained non-significant in models, both in combination and alone (**Fig. S5B, Table S4**).  
243 Mutations in efflux-related genes and gene regulators were the strongest predictor of  
244 collateral responses tested, explaining over 33% of the variation in the subset. Fitness  
245 alone also had significant predictive value, but to a lesser extent (17% variation  
246 explained). It is important to note that we observed correlation between efflux mutations  
247 and relative fitness that is likely explained by reduced fitness resulting from the cost of  
248 overexpression of efflux pump(s) (38).

249

250 To investigate the influence of resistance mechanism on IC<sub>90</sub> variation at a higher  
251 resolution, we modeled each AMR group separately relating the putative resistance

252 mechanism and fitness separately and in combination (**Fig. S5**). However potentially due  
253 to a lower number of samples within AMR groups and more detailed classification of the  
254 resistance mechanism, these factors had varying degrees of contribution. For TMP<sup>R</sup> and  
255 CIP<sup>R</sup> AMR groups, resistance mechanism was non-significant, but it was a significant  
256 factor for NIT<sup>R</sup> and MEC<sup>R</sup> mutants. Fitness was a significant factor of variation only for  
257 the MEC<sup>R</sup> group and similarly, combination models using both resistance mechanism and  
258 fitness were non-significant for all AMR groups, with the exception of the MEC<sup>R</sup> group.

259

260 **Collateral responses shift the mutation selection window.** The mutant selection  
261 window (MSW) can be defined as the concentration space between the lowest  
262 antimicrobial concentration that selects for and enriches resistant mutants (42) and the  
263 concentration that prevents the emergence of first step resistant mutants, the mutation  
264 prevention concentration (MPC) (43, 44). In theory, if drug concentrations remain above  
265 the MPC during treatment AMR is less likely to evolve (43, 44). It was recently  
266 demonstrated in *E. coli* MG1655 that changes in MPC correlated with collateral  
267 responses in AMR mutants (20). We determined the MPC for 17 strain:drug  
268 combinations that exemplified the conserved collateral responses (**Fig. 1**). The MPC for  
269 each AMR mutant and its respective WT were compared (**Fig. 3**). In 12/17 (70.6%) the  
270 change in MPC was consistent with the sign of collateral responses in IC<sub>90</sub>. This  
271 demonstrates that even small CS/CR changes can affect the MSW, correspondingly  
272 shifting it down or up. However, in 4/17 (23.5%) the MPC displayed no change between  
273 the WT and AMR mutant. This was observed when testing the MPC for MEC, TMP and  
274 AZT, though we speculate that increasing the precision of the MPC assay (as was done

275 with IC<sub>90</sub> testing) might negate these discrepancies. Changes in MPC results with AZT  
276 were inconsistent with the change in IC<sub>90</sub> for a CIP<sup>R</sup> mutant and the MEC<sup>R</sup> and NIT<sup>R</sup>  
277 mutants, which displayed a decreased MPC instead of an expected increase or no change,  
278 respectively.

279

## 280 **Discussion**

281 Here we present, to our knowledge, the first in depth study to identify conserved  
282 collateral responses in antimicrobial susceptibility across genetically diverse clinical *E.*  
283 *coli* strains following antimicrobial resistance development. Our findings are relevant  
284 beyond urinary tract infections because uropathogenic *E. coli* are shown to also stably  
285 colonize the bladder and gut (45), and to cause bloodstream infections (46). Our data  
286 show that CS and CR are pervasive in clinical *E. coli* strains, consistent with earlier  
287 results based on laboratory-adapted strains of various species (20-22, 24, 29, 47) and a  
288 limited number of clinical isolates (20, 29). Resistance to CIP resulted in a greater  
289 number of collateral responses than resistance to MEC, NIT, or TMP. CR was much  
290 more prevalent than CS, and the magnitude of the collateral responses were most often  
291 small, consistent with other reports (20-22). Overall we observed that collateral  
292 responses varied substantially by AMR group, but variation was also observed within  
293 AMR groups.

294

295 Using CS<sub>50</sub> and CR<sub>50</sub> thresholds to identify conserved responses, we found that conserved  
296 CR was more than twice as common as conserved CS. Whereas many of the conserved  
297 collateral responses identified in this study support the findings in previous work using

298 single laboratory-adapted strains, we observed several clinically relevant differences. For  
299 example, our finding of conserved CS in CIP<sup>R</sup> mutants to GEN was previously reported  
300 in *E. coli* K12 (21) but not in MG1655 (20). In the CIP<sup>R</sup> mutants we also observed  
301 conserved CR towards CHL, as reported in (20), but not in (22). We identified conserved  
302 CR of NIT<sup>R</sup> mutants to AMX, and this was not reported in MG1655 (20). These  
303 observations underscore the importance of exploring collateral networks in multiple  
304 mutants of different clinical strain backgrounds and with different resistance mechanisms  
305 to assess their potential clinical application. Visual inspection of the data revealed a few  
306 clinically relevant examples of CS phenotypes that appeared independent of putative  
307 mechanism of resistance. We show that CIP<sup>R</sup> *E. coli* strains displayed CS towards GEN,  
308 FOS, ETP and COL, and these phenotypes were conserved across multiple mechanisms  
309 of resistance. These results parallel those of a recent study on *P. aeruginosa* clinical  
310 isolates from cystic fibrosis patients, where CIP<sup>R</sup> was associated with CS to GEN, FOS  
311 and COL. Taken together these data support the presence of general conserved collateral  
312 networks that may both affect the population dynamics of AMR during treatment and  
313 counter-select for resistance as recently indicated (30).

314

315 We assumed *a priori* that genetic background, AMR group, resistance mechanism, and  
316 the fitness cost of resistance could potentially affect the generality, sign and magnitude of  
317 collateral networks in clinical *E. coli* strains. Despite the fact that some collateral  
318 responses are conserved across different strains and mechanisms of resistance, our  
319 multivariate statistical approaches show overall that mechanism of resistance is the key  
320 predictor of CS and CR variability. This is primarily the case for efflux related mutations.

321 However, mechanism of resistance also significantly contributed to the observed CS and  
322 CR variation in the MEC mutants where no efflux mutations were found. The presented  
323 data are consistent with earlier reports based on multiple AMR mutants derived from  
324 single strains with different resistance mechanisms towards specific antimicrobials (21,  
325 22, 48). Our finding that genetic background did not significantly contribute to collateral  
326 responses is an important addition to these earlier studies. Finally, we found that the  
327 fitness cost of resistance also contributed significantly to the observed variation in CS  
328 and CR, despite some overlap in explanatory power due to the observed correlation  
329 between efflux-related mutations and reduced fitness. Taken together, our data and  
330 previous reports indicate that applied use of collateral networks in future treatment  
331 strategies may be dependent on rapid identification of specific resistance mechanisms.  
332 Moreover, clinical application of CS as a selection inversion strategy warrants further  
333 investigations to ideally explore CS in isogenic backgrounds, representing several diverse  
334 strains, with permutations of all known AMR-associated resistance traits. Such extensive  
335 studies would likely provide valuable information on the mechanisms of CS. Other  
336 confounding factors such as mobile genetic elements with heterogeneous resistance  
337 determinants should also be investigated as they would likely influence and reduce the  
338 predictability of collateral networks.

339

340 Selection inversion, as described by (20), depends on the cycling of drug pairs that  
341 display reciprocal CS. We did not observe reciprocal CS between any of the four drugs  
342 studied here that are widely used for treatment of urinary tract infections. However, we  
343 asked if modest reductions and increases in antimicrobial susceptibilities would affect the

344 MSW (43) for the most prevalent CS and CR phenotypes. We subjected conserved CS  
345 and CR phenotypes to MPC assays and revealed that even a small 1.5-fold change in IC<sub>90</sub>  
346 could equally alter the MPC, resulting in a shift of the MSW. These results suggest that  
347 antimicrobial treatment strategies informed by collateral networks could affect AMR  
348 evolutionary trajectories. Sequential treatment using drug pairs that display CR would,  
349 following resistance development, shift the MSW towards higher antimicrobial  
350 concentrations and increase the likelihood for resistance development to subsequent  
351 treatment options. Conversely, sequential treatment based on drug pairs that display CS  
352 can shift the MSW down and reduce the window of opportunity for high-level resistance  
353 development. This result suggests that the initial choice of antimicrobial may set the  
354 stage for later resistance development (**Fig. 4**). Based on our *in vitro* findings, TMP and  
355 NIT are attractive from a clinical perspective, as resistance to these resulted in few  
356 collateral responses, preserving the innate sensitivity to available secondary  
357 antimicrobials. However, MEC could be even more attractive, as CS largely dominates  
358 the observed collateral responses in MEC<sup>R</sup> mutations. Additionally MEC<sup>R</sup> isolates,  
359 especially those evolved *in vivo*, are associated with high cost of resistance (41). In  
360 contrast, CIP exposure was more likely to cause dramatic collateral responses that  
361 depended on the mechanism of resistance and could potentially negatively impact future  
362 therapeutic options. These observations align with antimicrobial treatment  
363 recommendations in Norway, where MEC, NIT and TMP are recommended for first line  
364 therapy of uncomplicated UTI, and CIP is reserved for otherwise complicated infections  
365 (49). Similarly, in the United States NIT, SXT (TMP-SMX) and MEC are recommended  
366 before fluoroquinolones such as CIP, ofloxacin, and levofloxacin (50).



367

368 Our conclusions are not without limitations. First, we acknowledge that including more  
369 clinical isolates from different infection foci, more diverse genetic backgrounds, as well  
370 as other selective agents, could change the outcome of our statistical analyses. This  
371 would allow increased sensitivity for the assessment of the different factors controlling  
372 collateral responses. A more targeted approach to assess the impact of specific resistance  
373 mechanisms on CS and CR across genetically diverse clinical strains is lacking in the  
374 field. Our analyses suggest that the fitness cost of resistance explains some variability in  
375 the collateral networks reported here. While it is known that growth rates affect antibiotic  
376 action (51), the underlying mechanism is currently unknown. It is also unclear if  
377 collateral networks will be perturbed by compensatory evolution, which eliminates the  
378 fitness costs of primary resistance (52-54). Finally, this and previous studies focus on  
379 AMR development to a single drug and there is a complete lack of data on how multidrug  
380 resistance, including resistance genes on mobile genetic elements, will affect collateral  
381 networks. We are currently investigating these and other questions that will aid in our  
382 understanding of collateral networks and their potential therapeutic application.

383

## 384 **Methods**

385 **Bacterial strains.** We used ten clinical urinary tract infection isolates of *E. coli* from the  
386 ECO-SENS collections (55, 56) originating from countries across Europe between 2000  
387 and 2008 (**Table 1**). The isolates were chosen to represent pan-susceptible strains with  
388 diverse genetic backgrounds and were reported plasmid-free (31). Subsequent analysis  
389 based on whole-genome sequencing discovered two changes to previously reported

390 ST's and the presence of plasmid replicons in three strains (**Table S5E**). *E. coli*  
391 ATCC 25922 was used for reference and quality control purposes. For general growth,  
392 bacterial strains were grown in either Miller Difco Luria-Bertani (LB) broth (Becton,  
393 Dickinson and Co., Sparks MD, USA) or on LB agar; LB broth supplemented with select  
394 agar (Sigma-Aldrich) at 15 g/L. All strains were incubated at 37°C.

395

396 **Selection of AMR mutants.** Single AMR mutants were selected at MICs above the  
397 European Committee on Antimicrobial Susceptibility Testing (EUCAST) clinical  
398 breakpoints (57) for CIP, NIT, TMP and MEC (**Table 1**). Resistant mutants were  
399 selected on Mueller Hinton II agar (MHA-SA; Sigma-Aldrich) for CIP, NIT and TMP  
400 using a step-wise static selection. MEC<sup>R</sup> mutants were selected as single-step mutants on  
401 LB agar. For more details, see **Text S1**. AMR mutants were confirmed as *E. coli* using  
402 matrix-assisted laser desorption ionization time-of-flight (MALDI-TOF) analysis with  
403 MALDI BioTyper software (Bruker, MA, USA).

404

405 **Antimicrobial susceptibility testing.** AMR mutants were screened for resistance above  
406 EUCAST breakpoints (**Table S1**, (57)) with gradient diffusion strips following  
407 manufacturers guidelines (Liofilchem, Italy), on Mueller Hinton II agar (MHA-BD;  
408 Becton, Dickinson and Company) after 18 hours incubation. Plates with insufficient  
409 growth were incubated an additional 24 hours.

410

411 Collateral changes to 16 antimicrobials (**Table 2**) were determined by IC<sub>90</sub> testing (20),  
412 with some modifications. Standard 2-fold concentrations and median values between

413 them were used as a “1.5-fold” testing scale. IC<sub>90</sub> values were read as the first  
414 concentration tested that resulted in  $\geq 90\%$  inhibition of growth (optical density at  
415 600nm, OD<sub>600</sub>) following 18 hours incubation at 700 rpm (3 mm stroke) in Mueller  
416 Hinton Broth (MHB, Becton, Dickinson and Company). Percent inhibition was  
417 calculated as previously described (20). IC<sub>90</sub> results were determined in at least three  
418 biological replicates on separate days always including the control strain ATCC 25922.  
419 The final result reflects the average of a minimum of three replicates that met quality  
420 control standards (**Text S1**). Fold change in IC<sub>90</sub> was calculated as the ratio between the  
421 AMR mutant and its respective WT.

422

423 Dose response curves were generated with averages of OD<sub>600</sub> values (background  
424 subtracted) for each concentration tested during the IC<sub>90</sub> experiments. Averages were  
425 plotted for AMR mutants and respective WT strains.

426

427 **Mutation prevention concentration testing.** CS and CR trends to single drugs present  
428 in  $\geq 50\%$  of the isolates (CS<sub>50</sub> or CR<sub>50</sub>), were confirmed by determining the mutation  
429 prevention concentrations (MPCs), essentially as described previously (58). Briefly, 10  
430 mL aliquots of an overnight culture were pelleted and re-suspended in 1 mL MHB,  
431 estimated to contain  $\geq 10^{10}$  CFU (actual values were  $1.4 \times 10^{10}$  -  $7 \times 10^{10}$  CFU). The  
432 inoculum was split and spread onto four large (14 cm diameter) MHA-SA agar plates for  
433 each antimicrobial concentration tested (4 - 6 concentrations of a 2-fold dilution series).  
434 The MPC was the lowest concentration with no visible growth after 48 h (**Text S1**).

435 AMR mutants and WTs were tested in parallel and the results represent the average of a  
436 minimum of two biological replicates.

437

438 **Growth rate measurements.** Growth curves of WT and AMR mutants were generated  
439 in a Versamax plate reader (Molecular Devices Corporation, California, USA) with  
440 constant shaking overnight. The OD<sub>600</sub> was measured every 10 minutes and growth rates  
441 were estimated using GrowthRates v.2.1 software (59) (**Text S1**).

442

443 **Identification of genetic AMR determinants.** Genomic DNA was isolated using the  
444 GenElute Bacterial Genomic DNA kit (Sigma-Aldrich) following guidelines for Gram-  
445 positive DNA extraction. Purity and quantification of genomic DNA was determined  
446 with Nanodrop (Thermo Scientific) and Qubit High Sensitivity DNA assay (Life  
447 Technologies), respectively and used to prepare libraries using the DNA Ultra II Library  
448 Preparation Kit (New England Biolabs, E7645) according to manufacturers description  
449 (**Text S1**). Libraries were then quantified by Qubit High Sensitivity DNA assay and  
450 distributions assessed by Bioanalyser DNA 1000 Chip (Agilent, 5067-1504) before  
451 normalizing and pooling. The final library pool was sequenced on the MiSeq (Illumina,  
452 San Diego) using 250 bp paired end reads and V2 chemistry.

453

454 WT genomes were assembled as described in **Text S1**. WT genomes were annotated  
455 with Rapid Annotation using Subsystem Technology server (RAST, version 2.0) for *E.*  
456 *coli* (60). SeqMan NGen (DNASTAR, Madison, WI) was used for comparative analysis  
457 of raw AMR mutant Illumina reads, using standard settings. AMR mutant reads were

458 aligned to the corresponding annotated WT genome assembly. Reported SNPs had  $\geq 10x$   
459 coverage depth and  $\geq 90\%$  variant base calls. SNPs present in the WT assembly or in at  
460 least two AMR mutants of the same strain background were excluded. Genetic deletions  
461 and rearrangements were identified in the structural variation report generated in SeqMan  
462 Pro (DNASTAR) and were manually inspected and annotated using Gene Construction  
463 Kit (Textco Biosoftware Inc., Raleigh, NC) and NCBI BLAST searches, respectively.

464

465 **Multivariate Statistical Analyses.** The fold changes of mean  $IC_{90}$  values (collateral  
466 responses) were determined relative to the parental WT strain and log transformed.  
467 Statistical analyses were performed on the complete data set, as well as a subset of the  
468 data excluding five antimicrobials, those to which primary AMR was evolved (CIP,  
469 MEC, NIT, and TMP) and SXT. To estimate and test the effects of strain background,  
470 AMR group, AMR mechanism, growth rate and relative fitness we relied on multivariate  
471 modeling, via redundancy analysis, to address the co-variation in  $IC_{90}$  across  
472 antimicrobials. The linear constraint scores were plotted for each AMR mutant. The  
473 response variables were overlaid with independent scaling to illustrate the direction of  
474 “steepest ascent” (increasing CR) from the origin for each antimicrobial. The  
475 significance of multivariate models and of their factors was assessed by permutation tests  
476 (1000 permutations) where  $p < 0.05$  was considered significant. These analyses were  
477 done in R (61) using the Vegan work package (62).

478

479 **Data availability.** Whole-genome sequencing data are available within the NCBI  
480 BioProject PRJNA419689. All other relevant data are available within this article, its  
481 Supplementary Information, or from the corresponding author upon request.

482

### 483 **Acknowledgments**

484 We thank Tony Brooks at UCL Genomics for expertise in genome sequencing, Ane L.G.  
485 Utnes for generation of NIT<sup>R</sup> mutants, Maria Chiara Di Luca for analysis of the genomes  
486 for MLST and identification of plasmid replicons, and Søren Overballe-Petersen for  
487 preliminary processing of WT genomes. Funding for this project was provided through  
488 the Northern Norway Regional Health Authority and UiT - The Arctic University of  
489 Norway (Project SFP1292-16), and JPI-EC-AMR (Project 271176/H10).

490

### 491 **Author Contributions**

492 P.J.J. and Ø.S. conceived the project; N.L.P., E.G.A.F., J.K., and V.S. designed and  
493 performed experiments; R.P. designed and R.P and N.L.P. performed the multivariate  
494 statistical modeling; all authors analyzed, interpreted and discussed the data; and N.L.P.,  
495 E.G.A.F., A.P.R., D.E.R., and P.J.J. wrote the manuscript with contributions from the  
496 other authors.

497

### 498 **References**

499

500 1. Holmes AH, Moore LSP, Sundsfjord A, Steinbakk M, Regmi S, Karkey A,  
501 Guerin PJ, Piddock LJV. 2016. Understanding the mechanisms and drivers of  
502 antimicrobial resistance. *The Lancet* 387:176-187.

- 503 2. Cantas L, Shah SQ, Cavaco LM, Manaia CM, Walsh F, Popowska M, Garelick H,  
504 Burgmann H, Sorum H. 2013. A brief multi-disciplinary review on antimicrobial  
505 resistance in medicine and its linkage to the global environmental microbiota.  
506 *Front Microbiol* 4:96.
- 507 3. Andersson DI, Hughes D. 2014. Microbiological effects of sublethal levels of  
508 antibiotics. *Nat Rev Microbiol* 12:465-78.
- 509 4. Silver LL. 2011. Challenges of antibacterial discovery. *Clin Microbiol Rev* 24:71-  
510 109.
- 511 5. Walsh C. 2003. Where will new antibiotics come from? *Nat Rev Microbiol* 1:65-  
512 70.
- 513 6. Fischbach MA, Walsh CT. 2009. Antibiotics for emerging pathogens. *Science*  
514 325:1089-93.
- 515 7. Infectious Diseases Society of America. 2010. The 10 x '20 Initiative: pursuing a  
516 global commitment to develop 10 new antibacterial drugs by 2020. *Clin Infect*  
517 *Dis* 50:1081-3.
- 518 8. World Health Organization. 2001. WHO global strategy of containment of  
519 antimicrobial resistance. World Health Organization, Geneva, Switzerland.
- 520 9. O'Neil J. 2016. Tackling Drug-Resistant Infections Globally: Final Report and  
521 Recommendations. Wellcome Trust & HM Government,
- 522 10. Centers for Disease Control and Prevention (U.S.). 2014. The Core Elements of  
523 Hospital Antibiotic Stewardship Programs. Atlanta, GA.

- 524 11. Harbarth S, Balkhy HH, Goossens H, Jarlier V, Kluytmans J, Laxminarayan R,  
525 Saam M, Van Belkum A, Pittet D. 2015. Antimicrobial resistance: one world, one  
526 fight! Antimicrobial Resistance and Infection Control 4.
- 527 12. OPGA/WHO/FAO/OIE. 21 Sept 2016. PRESS RELEASE: High-Level Meeting  
528 on Antimicrobial Resistance. Available at  
529 [https://www.un.org/pga/71/2016/09/21/press-release-hl-meeting-on-](https://www.un.org/pga/71/2016/09/21/press-release-hl-meeting-on-antimicrobial-resistance)  
530 [antimicrobial-resistance](https://www.un.org/pga/71/2016/09/21/press-release-hl-meeting-on-antimicrobial-resistance). PGA Press Releases, New York, NY USA.
- 531 13. Johnsen PJ, Townsend JP, Bohn T, Simonsen GS, Sundsfjord A, Nielsen KM.  
532 2009. Factors affecting the reversal of antimicrobial-drug resistance. Lancet Infect  
533 Dis 9:357-64.
- 534 14. Johnsen PJ, Townsend JP, Bohn T, Simonsen GS, Sundsfjord A, Nielsen KM.  
535 2011. Retrospective evidence for a biological cost of vancomycin resistance  
536 determinants in the absence of glycopeptide selective pressures. J Antimicrob  
537 Chemother 66:608-10.
- 538 15. Enne VI, Livermore DM, Stephens P, Hall LMC. 2001. Persistence of  
539 sulphonamide resistance in *Escherichia coli* in the UK despite national  
540 prescribing restriction. The Lancet 357:1325-1328.
- 541 16. Sundqvist M, Geli P, Andersson DI, Sjolund-Karlsson M, Runehagen A, Cars H,  
542 Abelson-Storby K, Cars O, Kahlmeter G. 2010. Little evidence for reversibility of  
543 trimethoprim resistance after a drastic reduction in trimethoprim use. J  
544 Antimicrob Chemother 65:350-60.
- 545 17. Andersson DI, Hughes D. 2010. Antibiotic resistance and its cost: is it possible to  
546 reverse resistance? Nat Rev Microbiol 8:260-71.



- 547 18. Baym M, Stone LK, Kishony R. 2016. Multidrug evolutionary strategies to  
548 reverse antibiotic resistance. *Science* 351:aad3292.
- 549 19. Szybalski W, Bryson V. 1952. Genetic studies on microbial cross resistance to  
550 toxic agents. I. Cross resistance of *Escherichia coli* to fifteen antibiotics. *J*  
551 *Bacteriol* 64:489-99.
- 552 20. Imamovic L, Sommer MO. 2013. Use of collateral sensitivity networks to design  
553 drug cycling protocols that avoid resistance development. *Sci Transl Med*  
554 5:204ra132.
- 555 21. Lazar V, Pal Singh G, Spohn R, Nagy I, Horvath B, Hrtyan M, Busa-Fekete R,  
556 Bogos B, Mehi O, Csorgo B, Posfai G, Fekete G, Szappanos B, Kegl B, Papp B,  
557 Pal C. 2013. Bacterial evolution of antibiotic hypersensitivity. *Mol Syst Biol*  
558 9:700.
- 559 22. Lazar V, Nagy I, Spohn R, Csorgo B, Gyorkei A, Nyerges A, Horvath B, Voros  
560 A, Busa-Fekete R, Hrtyan M, Bogos B, Mehi O, Fekete G, Szappanos B, Kegl B,  
561 Papp B, Pal C. 2014. Genome-wide analysis captures the determinants of the  
562 antibiotic cross-resistance interaction network. *Nat Commun* 5:4352.
- 563 23. Sanders CC, Sanders Jr. WE, Goering RV, Werner V. 1984. Selection of Multiple  
564 Antibiotic Resistance by Quinolones,  $\beta$ -Lactams and Aminoglycosides with  
565 Special Reference to Cross-Resistance Between Unrelated Drug Classes.  
566 *Antimicrob Agents Chemother* 26:797-801.
- 567 24. Gonzales PR, Pesesky MW, Bouley R, Ballard A, Biddy BA, Suckow MA,  
568 Wolter WR, Schroeder VA, Burnham CA, Mobashery S, Chang M, Dantas G.

- 569 2015. Synergistic, collaterally sensitive beta-lactam combinations suppress  
570 resistance in MRSA. *Nat Chem Biol* 11:855-61.
- 571 25. Macvanin M, Hughes D. 2005. Hyper-susceptibility of a fusidic acid-resistant  
572 mutant of *Salmonella* to different classes of antibiotics. *FEMS Microbiol Lett*  
573 247:215-20.
- 574 26. Barbosa C, Trebosc V, Kemmer C, Rosenstiel P, Beardmore R, Schulenburg H,  
575 Jansen G. 2017. Alternative Evolutionary Paths to Bacterial Antibiotic Resistance  
576 Cause Distinct Collateral Effects. *Mol Biol Evol* 34:2229-2244.
- 577 27. Kim S, Lieberman TD, Kishony R. 2014. Alternating antibiotic treatments  
578 constrain evolutionary paths to multidrug resistance. *Proc Natl Acad Sci U S A*  
579 111:14494-9.
- 580 28. Fuentes-Hernandez A, Plucain J, Gori F, Pena-Miller R, Reding C, Jansen G,  
581 Schulenburg H, Gudelj I, Beardmore R. 2015. Using a sequential regimen to  
582 eliminate bacteria at sublethal antibiotic dosages. *PLoS Biol* 13:e1002104.
- 583 29. Jansen G, Mahrt N, Tueffers L, Barbosa C, Harjes M, Adolph G, Friedrichs A,  
584 Krenz-Weinreich A, Rosenstiel P, Schulenburg H. 2016. Association between  
585 clinical antibiotic resistance and susceptibility of *Pseudomonas* in the cystic  
586 fibrosis lung. *Evol Med Public Health* 2016:182-94.
- 587 30. Imamovic L, Ellabaan MMH, Dantas Machado AM, Citterio L, Wulff T, Molin S,  
588 Krogh Johansen H, Sommer MOA. 2018. Drug-Driven Phenotypic Convergence  
589 Supports Rational Treatment Strategies of Chronic Infections. *Cell*  
590 doi:10.1016/j.cell.2017.12.012.

- 591 31. Bengtsson S, Naseer U, Sundsfjord A, Kahlmeter G, Sundqvist M. 2012.  
592 Sequence types and plasmid carriage of uropathogenic *Escherichia coli* devoid of  
593 phenotypically detectable resistance. *J Antimicrob Chemother* 67:69-73.
- 594 32. Munck C, Gumpert HK, Wallin AI, Wang HH, Sommer MO. 2014. Prediction of  
595 resistance development against drug combinations by collateral responses to  
596 component drugs. *Sci Transl Med* 6:262ra156.
- 597 33. Munck CS, M. 2014. Antibiotic Resistance: Adaptive Evolution & Dissemination  
598 of Resistance Genes. PhD. DTU.
- 599 34. Kushner B, Allen PD, Crane BT. 2016. Frequency and Demographics of  
600 Gentamicin Use. *Otol Neurotol* 37:190-5.
- 601 35. Karageorgopoulos DE, Wang R, Yu XH, Falagas ME. 2012. Fosfomycin:  
602 evaluation of the published evidence on the emergence of antimicrobial resistance  
603 in Gram-negative pathogens. *J Antimicrob Chemother* 67:255-68.
- 604 36. Dijkmans AC, Zacarias NVO, Burggraaf J, Mouton JW, Wilms EB, van  
605 Nieuwkoop C, Touw DJ, Stevens J, Kamerling IMC. 2017. Fosfomycin:  
606 Pharmacological, Clinical and Future Perspectives. *Antibiotics (Basel)* 6.
- 607 37. Wang H, Dzink-Fox JL, Chen M, Levy SB. 2001. Genetic characterization of  
608 highly fluoroquinolone-resistant clinical *Escherichia coli* strains from China: role  
609 of *acrR* mutations. *Antimicrob Agents Chemother* 45:1515-21.
- 610 38. Pietsch F, Bergman JM, Brandis G, Marcusson LL, Zorzet A, Huseby DL,  
611 Hughes D. 2016. Ciprofloxacin selects for RNA polymerase mutations with  
612 pleiotropic antibiotic resistance effects. *J Antimicrob Chemother*  
613 doi:10.1093/jac/dkw364.

- 614 39. Kern WV, Oethinger M, Jellen-Ritter AS, Levy SB. 2000. Non-Target Gene  
615 Mutations in the Development of Fluoroquinolone Resistance in *Escherichia coli*.  
616 Antimicrob Agents Chemother 44:814-820.
- 617 40. Huseby DL, Pietsch F, Brandis G, Garoff L, Tegehall A, Hughes D. 2017.  
618 Mutation supply and relative fitness shape the genotypes of ciprofloxacin-  
619 resistant *Escherichia coli*. Mol Biol Evol 34:1029-1039.
- 620 41. Thulin E, Sundqvist M, Andersson DI. 2015. Amdinocillin (Mecillinam)  
621 resistance mutations in clinical isolates and laboratory-selected mutants of  
622 *Escherichia coli*. Antimicrob Agents Chemother 59:1718-27.
- 623 42. Gullberg E, Cao S, Berg OG, Ilback C, Sandegren L, Hughes D, Andersson DI.  
624 2011. Selection of resistant bacteria at very low antibiotic concentrations. PLoS  
625 Pathog 7:e1002158.
- 626 43. Drlica K, Zhao X. 2007. Mutant selection window hypothesis updated. Clin Infect  
627 Dis 44:681-8.
- 628 44. Liang B, Bai N, Cai Y, Wang R, Drlica K, Zhao X. 2011. Mutant prevention  
629 concentration-based pharmacokinetic/pharmacodynamic indices as dosing targets  
630 for suppressing the enrichment of levofloxacin-resistant subpopulations of  
631 *Staphylococcus aureus*. Antimicrob Agents Chemother 55:2409-12.
- 632 45. Nielsen KL, Stegger M, Godfrey PA, Feldgarden M, Andersen PS, Frimodt-  
633 Moller N. 2016. Adaptation of *Escherichia coli* traversing from the faecal  
634 environment to the urinary tract. Int J Med Microbiol 306:595-603.
- 635 46. Subashchandrabose S, Mobley HL. 2015. Virulence and Fitness Determinants of  
636 Uropathogenic *Escherichia coli*. Microbiol Spectr 3.

- 637 47. Pal C, Papp B, Lazar V. 2015. Collateral sensitivity of antibiotic-resistant  
638 microbes. Trends Microbiol doi:10.1016/j.tim.2015.02.009.
- 639 48. Jiao YJ, Baym M, Veres A, Kishony R. 2016. Population diversity jeopardizes the  
640 efficacy of antibiotic cycling. BioRxiv 082107.
- 641 49. Norwegian Directorate of Health. 2012. Antibiotic use in Norwegian primary  
642 healthcare. National guidelines version 1.3.
- 643 50. Gupta K, Hooton TM, Naber KG, Wullt B, Colgan R, Miller LG, Moran GJ,  
644 Nicolle LE, Raz R, Schaeffer AJ, Soper DE, Infectious Diseases Society of A,  
645 European Society for M, Infectious D. 2011. International clinical practice  
646 guidelines for the treatment of acute uncomplicated cystitis and pyelonephritis in  
647 women: A 2010 update by the Infectious Diseases Society of America and the  
648 European Society for Microbiology and Infectious Diseases. Clin Infect Dis  
649 52:e103-20.
- 650 51. Greulich P, Scott M, Evans MR, Allen RJ. 2015. Growth-dependent bacterial  
651 susceptibility to ribosome-targeting antibiotics. Molecular Systems Biology  
652 11:796-796.
- 653 52. Schrag SJ, V. P, Levin BR. 1997. Adaptation to the fitness costs of antibiotic  
654 resistance in *Escherichia coli*. Proc R Soc Lon B 264:1287-1291.
- 655 53. Björkman J, Nagaev I, Berg OG, D. Hughes D, Andersson DI. 2000. Effects of  
656 Environment on Compensatory Mutations to Ameliorate Costs of Antibiotic  
657 Resistance. Science 287:1479-1482.
- 658 54. Starikova I, Harms K, Haugen P, Lunde TTM, Primicerio R, Samuelsen Ø,  
659 Nielsen KM, Johnsen PJ. 2012. A Trade-off between the Fitness Cost of

- 660 Functional Integrases and Long-term Stability of Integrons. PLoS Pathog  
661 8:e1003043.
- 662 55. Kahlmeter G. 2000. The ECO.SENS Project: a prospective, multinational,  
663 multicentre epidemiological survey of the prevalence and antimicrobial  
664 susceptibility of urinary tract pathogens--interim report. J Antimicrob Chemother  
665 46 Suppl 1:15-22; discussion 63-5.
- 666 56. Kahlmeter G, Poulsen HO. 2012. Antimicrobial susceptibility of *Escherichia coli*  
667 from community-acquired urinary tract infections in Europe: the ECO.SENS  
668 study revisited. Int J Antimicrob Agents 39:45-51.
- 669 57. The European Committee on Antimicrobial Susceptibility Testing. 2017.  
670 Breakpoint tables for interpretation of MICs and zone diameters. Version 7.1,  
671 Available at <http://www.eucast.org>.
- 672 58. Marcusson LL, Olofsson SK, Komp Lindgren P, Cars O, Hughes D. 2005. Mutant  
673 prevention concentrations of ciprofloxacin for urinary tract infection isolates of  
674 *Escherichia coli*. J Antimicrob Chemother 55:938-43.
- 675 59. Hall BG, Acar H, Nandipati A, Barlow M. 2014. Growth rates made easy. Mol  
676 Biol Evol 31:232-8.
- 677 60. Aziz RK, Bartels D, Best AA, DeJongh M, Disz T, Edwards RA, Formsma K,  
678 Gerdes S, Glass EM, Kubal M, Meyer F, Olsen GJ, Olson R, Osterman AL,  
679 Overbeek RA, McNeil LK, Paarmann D, Paczian T, Parrello B, Pusch GD, Reich  
680 C, Stevens R, Vassieva O, Vonstein V, Wilke A, Zagnitko O. 2008. The RAST  
681 Server: rapid annotations using subsystems technology. BMC Genomics 9:75.

- 682 61. Team RC. 2013. R: A Language and Environment for Statistical Computing, R  
683 Foundation for Statistical Computing, Vienna, Austria. [http://www.R-](http://www.R-project.org/)  
684 [project.org/](http://www.R-project.org/).  
685 62. Dixon P. 2003. VEGAN, a package of R functions for community ecology.  
686 Journal of Vegetation Science 14:927-930.  
687

688 **Supplementary Information List**

689

690 **Text S1**

691

692 **Figure S1:** The distribution of average  $IC_{90}$  values for wild-type *Escherichia coli* clinical  
693 isolates.

694 **Figure S2:** Collateral changes in susceptibility of 40 AMR mutants to 16 antimicrobials.

695 **Figure S3:** Dose response curves of representative strain:drug combinations that  
696 demonstrate frequently observed collateral responses ( $CS_{50}$  and  $CR_{50}$ ).

697 **Figure S4:** Relative growth rate of AMR mutants compared to their respective WT  
698 ancestors.

699 **Figure S5:** Multivariate models displaying the contribution of individual and  
700 combinations of factors to collateral networks.

701

702 **Table S1:** Gradient strip diffusion MIC values of AMR mutants.

703 **Table S2:** Tabulation of collateral responses detected in 40 AMR mutants.

704 **Table S3:** Genomic analyses of whole genome sequencing data in WT strains and AMR  
705 mutants.

706 **Table S4:** Summary of the output from multivariate models.



**Table 1:** Description of *Escherichia coli* strains used in the study and susceptibility

changes following antimicrobial selection *in vitro*.

| Strain                             | ST <sup>2</sup> | Origin   | Average Inhibition Concentration 90% (IC <sub>90</sub> , µg/mL) <sup>1</sup> |                  |            |                  |                |                  |              |                  |
|------------------------------------|-----------------|----------|------------------------------------------------------------------------------|------------------|------------|------------------|----------------|------------------|--------------|------------------|
|                                    |                 |          | Ciprofloxacin                                                                |                  | Mecillinam |                  | Nitrofurantoin |                  | Trimethoprim |                  |
|                                    |                 |          | WT                                                                           | CIP <sup>R</sup> | WT         | MEC <sup>R</sup> | WT             | NIT <sup>R</sup> | WT           | TMP <sup>R</sup> |
| K56-2                              | 73              | Greece   | 0.014                                                                        | 16               | 0.146      | > 30             | 8              | > 64             | 0.225        | > 28             |
| K56-12                             | 104             | Portugal | 0.016                                                                        | 1.67             | 0.273      | 28               | 7.33           | > 64             | 0.563        | > 32             |
| K56-16 <sup>3</sup>                | 127             | Portugal | 0.009                                                                        | 3                | 0.167      | 18.7             | 4              | > 64             | 0.25         | > 30             |
| K56-41                             | 73              | Greece   | 0.016                                                                        | 2.33             | 0.104      | 13.3             | 6              | > 64             | 0.25         | 6.67             |
| K56-44 <sup>3</sup>                | 12              | Greece   | 0.013                                                                        | 1.67             | 0.141      | 16               | 6.67           | > 64             | 0.375        | 6                |
| K56-50                             | 100             | Greece   | 0.012                                                                        | 3                | 0.141      | 10.7             | 12             | > 64             | 0.172        | 18               |
| K56-68                             | 95              | Sweden   | 0.014                                                                        | 4                | 0.141      | 30               | 6.67           | > 64             | 0.208        | 18.7             |
| K56-70                             | 537             | Sweden   | 0.007                                                                        | 2.67             | 0.083      | > 32             | 4.67           | > 64             | 0.25         | 14.7             |
| K56-75 <sup>4</sup>                | 69              | UK       | 0.008                                                                        | 1.17             | 0.063      | 13               | 6              | > 64             | 0.167        | 5.33             |
| K56-78                             | 1235            | UK       | 0.015                                                                        | 6                | 0.141      | 16               | 8              | > 64             | 0.5          | 7.33             |
| Resistance Breakpoint <sup>5</sup> |                 |          | > 0.5                                                                        |                  | > 8        |                  | > 64           |                  | > 4          |                  |

<sup>1</sup> The average IC<sub>90</sub> values of three or more biological replicates. Individual results above detection limits (MEC = 32 µg/mL, NIT = 64 µg/mL, TMP = 32 µg/mL) were analyzed as those values, yielding final results with uncertainty (> average).

<sup>2</sup> Multi-locus sequence type

<sup>3,4</sup> strains containing the Col156 or Col(MP18) replicon, respectively.

<sup>5</sup> EUCAST Clinical Breakpoints v 7.1 for Enterobacteriaceae (56).

**Table 2:** List of antimicrobials used in this study.

| <b>Antimicrobial<sup>1</sup></b> | <b>Abbreviation</b> | <b>Drug Class</b>               | <b>Drug Target(s)</b>          | <b>Solvent</b>                                    |
|----------------------------------|---------------------|---------------------------------|--------------------------------|---------------------------------------------------|
| Amoxicillin                      | AMX                 | $\beta$ -lactam (Penicillin)    | Cell wall synthesis            | Phosphate buffer <sup>3</sup>                     |
| Azithromycin                     | AZT                 | Macrolide                       | Protein synthesis (50S)        | $\geq 95\%$ Ethanol                               |
| Ceftazidime                      | CAZ                 | $\beta$ -lactam (Cephalosporin) | Cell wall synthesis            | Water + 10% (w/w) Na <sub>2</sub> CO <sub>3</sub> |
| Chloramphenicol                  | CHL                 | Amphenicol                      | Protein synthesis (50S)        | $\geq 95\%$ Ethanol                               |
| Ciprofloxacin                    | CIP                 | Fluoroquinolone                 | DNA replication, cell division | 0.1N HCl                                          |
| Colistin                         | COL                 | Polymyxin                       | Cell wall & cell membrane      | Water                                             |
| Ertapenem                        | ETP                 | $\beta$ -lactam (Carbapenem)    | Cell wall synthesis            | Water                                             |
| Fosfomycin                       | FOS                 | Phosphonic                      | Cell wall synthesis (MurA)     | Water                                             |
| Gentamicin                       | GEN                 | Aminoglycoside                  | Protein synthesis (30S)        | Water                                             |
| Mecillinam                       | MEC                 | $\beta$ -lactam (Penicillin)    | Cell wall synthesis (PBP2)     | Water                                             |
| Nitrofurantoin                   | NIT                 | Nitrofuran                      | Multiple <sup>4</sup>          | Dimethyl sulfoxide                                |
| Trimethoprim                     | TMP                 | Antifolate                      | Folate synthesis (FolA)        | Dimethyl sulfoxide                                |
| Sulfamethoxazole                 | SMX                 | Antifolate                      | Folate synthesis (FolP)        | Dimethyl sulfoxide                                |
| TMP+SMX (1:19)                   | SXT                 | Antifolate                      | Folate synthesis (FolA+FolP)   | Dimethyl sulfoxide                                |
| Temocillin                       | TEM                 | $\beta$ -lactam (Penicillin)    | Cell wall synthesis            | Water                                             |
| Tetracycline                     | TET                 | Tetracycline                    | Protein synthesis (30S)        | Water                                             |
| Tigecycline                      | TGC                 | Tetracycline                    | Protein synthesis (30S)        | Water                                             |

<sup>1</sup> When available final antimicrobial concentration was determined using manufacturer-provided or calculated drug potencies, otherwise potency was assumed to be 100%. Aliquots were stored at -20°C or -80°C in single use vials. All antimicrobials and chemical solvents were obtained from Sigma-Aldrich (St. Louis, MO, USA) with the exception of CIP (Biochemika, now Sigma-Aldrich) and TEM (Negaban®).

<sup>3</sup> 0.1 mol/L, pH 6.0 phosphate buffer supplemented with 6.5% (v/v) 1M NaOH (sodium hydroxide).

<sup>4</sup> Nitrofurantoin is thought to target macromolecules including DNA and ribosomal proteins, affecting multiple cellular processes including protein, DNA, RNA and cell wall synthesis.

**Table 3:** The number of AMR mutants with resistance-associated mutations.

| AMR Mechanism                                         |                           | CIP <sup>R</sup> | MEC <sup>R</sup> | NIT <sup>R</sup> | TMP <sup>R</sup> |
|-------------------------------------------------------|---------------------------|------------------|------------------|------------------|------------------|
| Drug Target                                           | Modification              | 10 <sup>1</sup>  |                  |                  | 6                |
|                                                       | Overproduction            |                  |                  |                  | 6                |
| Drug Activation                                       | Nitroreductase disruption |                  |                  | 10               |                  |
| Drug Uptake                                           | Porin mutation            | 1                |                  |                  |                  |
|                                                       | AcrAB-TolC                | 7                |                  | 1                |                  |
| Efflux                                                | MdtK                      | 9                |                  | 1                |                  |
|                                                       | MdfA                      |                  |                  | 1                |                  |
|                                                       | EmrAB-TolC                |                  |                  | 7                |                  |
|                                                       | ABC transport             |                  | 1                |                  |                  |
| ppGpp synthesis<br>(stringent response<br>activation) | Stringent Response        |                  | 4                |                  |                  |
|                                                       | tRNA synthesis            |                  | 4                |                  |                  |
|                                                       | tRNA processing           |                  | 1                |                  |                  |
|                                                       | Cellular metabolism       |                  | 3                |                  |                  |

<sup>1</sup> All CIP<sup>R</sup> mutants contained one mutation in the *gyrA* gene, except K56-2 CIP<sup>R</sup> mutant that contained two mutations in *gyrA* and a mutation in *parC*.

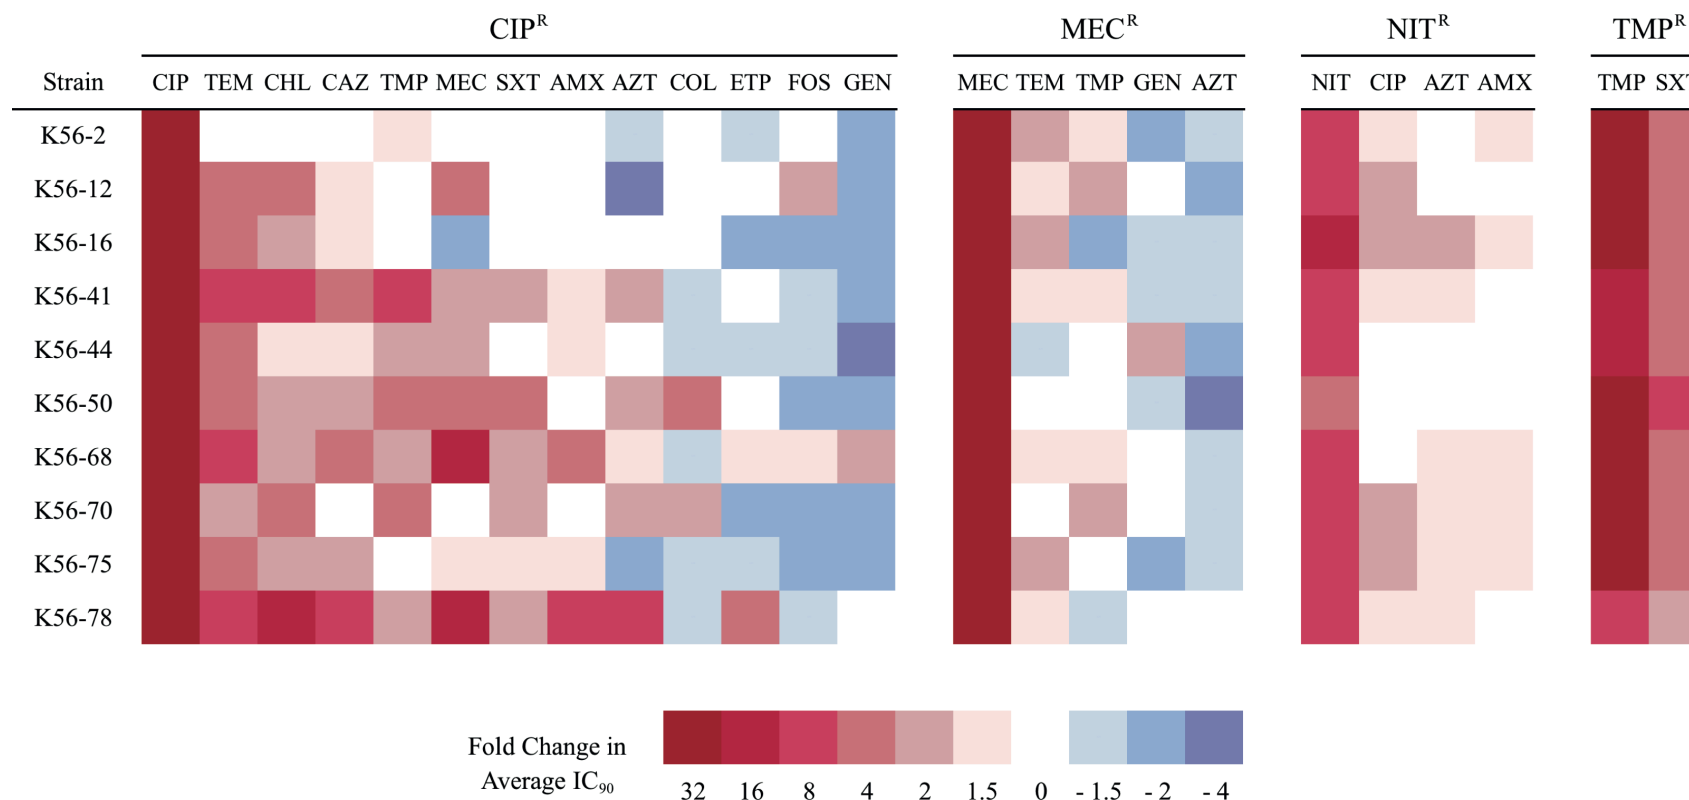

**Figure 1. Conserved collateral effects observed in AMR mutants of different AMR groups.** Relative change in antimicrobial susceptibility was determined by comparing average IC<sub>90</sub> values of AMR mutants to their respective WT strain. Collateral changes that were found in  $\geq 50\%$  of the strains are displayed. Antimicrobials are ordered by most frequent CR (left) to most frequent CS (right) for each AMR group. The only instances where CR was present in 100% of the strains of an AMR group were linked to the drug used for selection, including TMP<sup>R</sup> strains with CR to SXT (a combination of TMP and SMX).

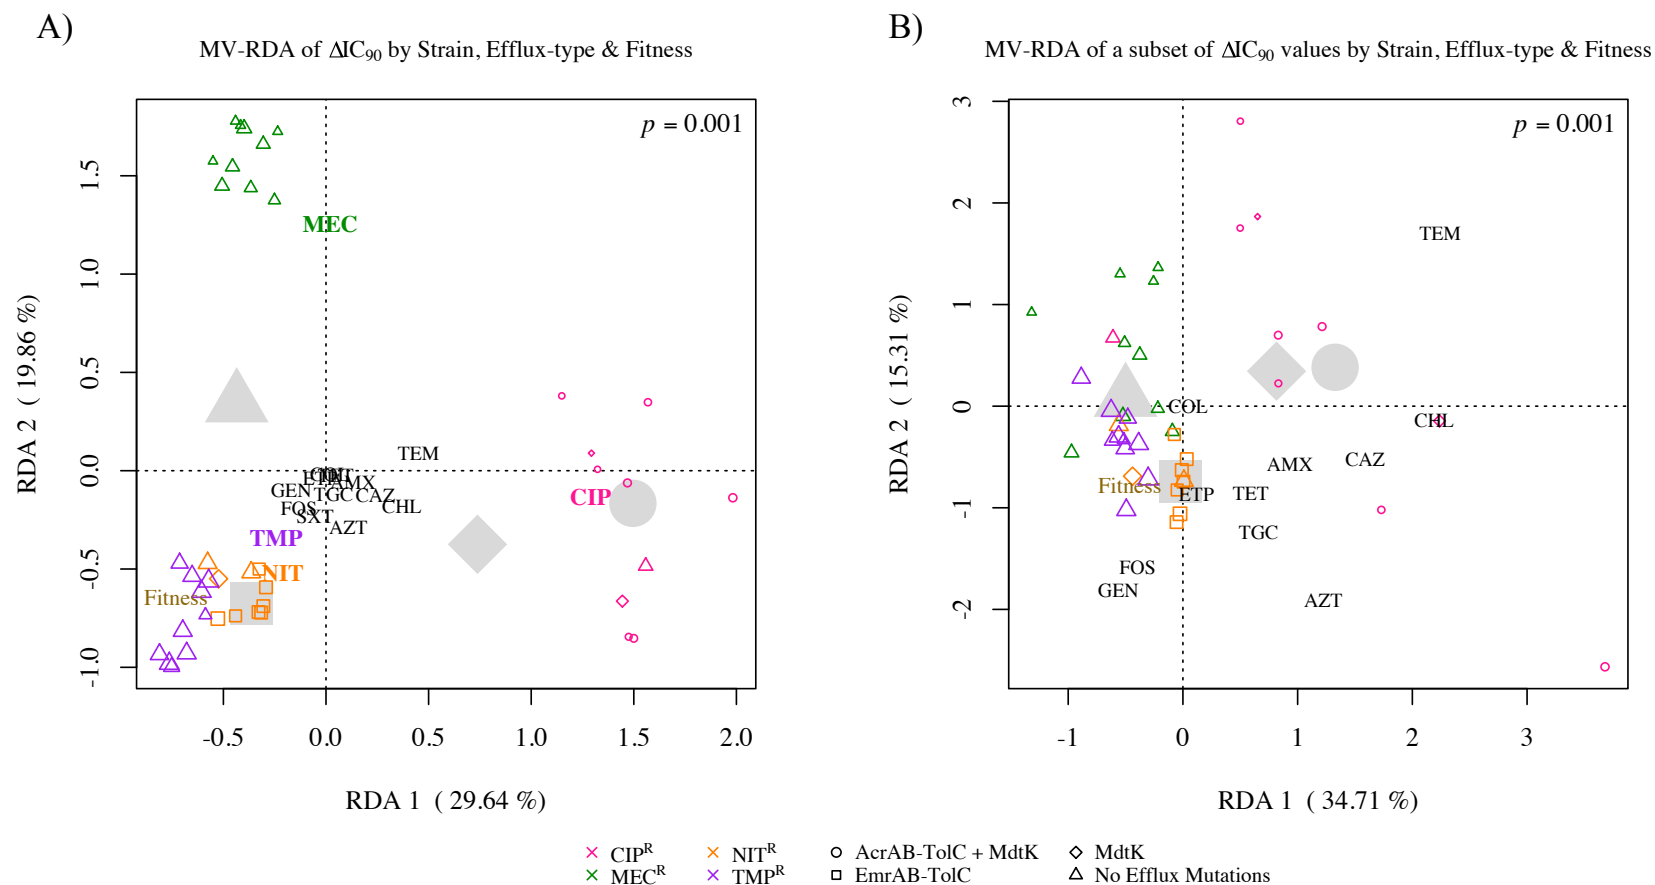

green, NIT<sup>R</sup> – gold, TMP<sup>R</sup> – purple), shape the assigned efflux type (circle – AcrAB-TolC + MdtK, square – EmrAB-TolC, diamond – MdtK, triangle – no efflux-related mutations), and symbol size is proportional to relative fitness, where smaller size indicates a greater reduction in growth rate compared to the WT. Antimicrobial drug names indicate the tip of vectors that pass through the origin in the direction of increasing IC<sub>90</sub> fold change or CR (direction of steepest ascent). These vectors can be used to interpret the change in IC<sub>90</sub> for the antimicrobials shown, e.g. there was little change in the IC<sub>90</sub> of drugs centered near the origin, such as COL in **B**. The vector tip of relative fitness (brown) is also shown. Large grey symbols show the centroids (average effect) for all AMR mutants within a given efflux group (shape). The majority of explained variation is driven by primary resistances (**A**), where CIP<sup>R</sup> mutants (pink) cluster away from the other three AMR groups along the CIP vector, indicating higher resistance to CIP. CIP<sup>R</sup> mutants are likely to show CR to CHL, CAZ, TEM and AZT, but sensitivity to GEN, FOS and TMP. MEC<sup>R</sup> isolates primarily display low-level CS to most antimicrobials tested. TMP<sup>R</sup> and NIT<sup>R</sup> groups cluster together with relatively few collateral effects. The analysis of the subset (**B**) shows patterns consistent with the full model, but with less clustering by AMR group. However, in the redundancy analysis on a subset of the IC<sub>90</sub> fold changes (**B**) there is far less clustering of the AMR mutants by AMR group (color).

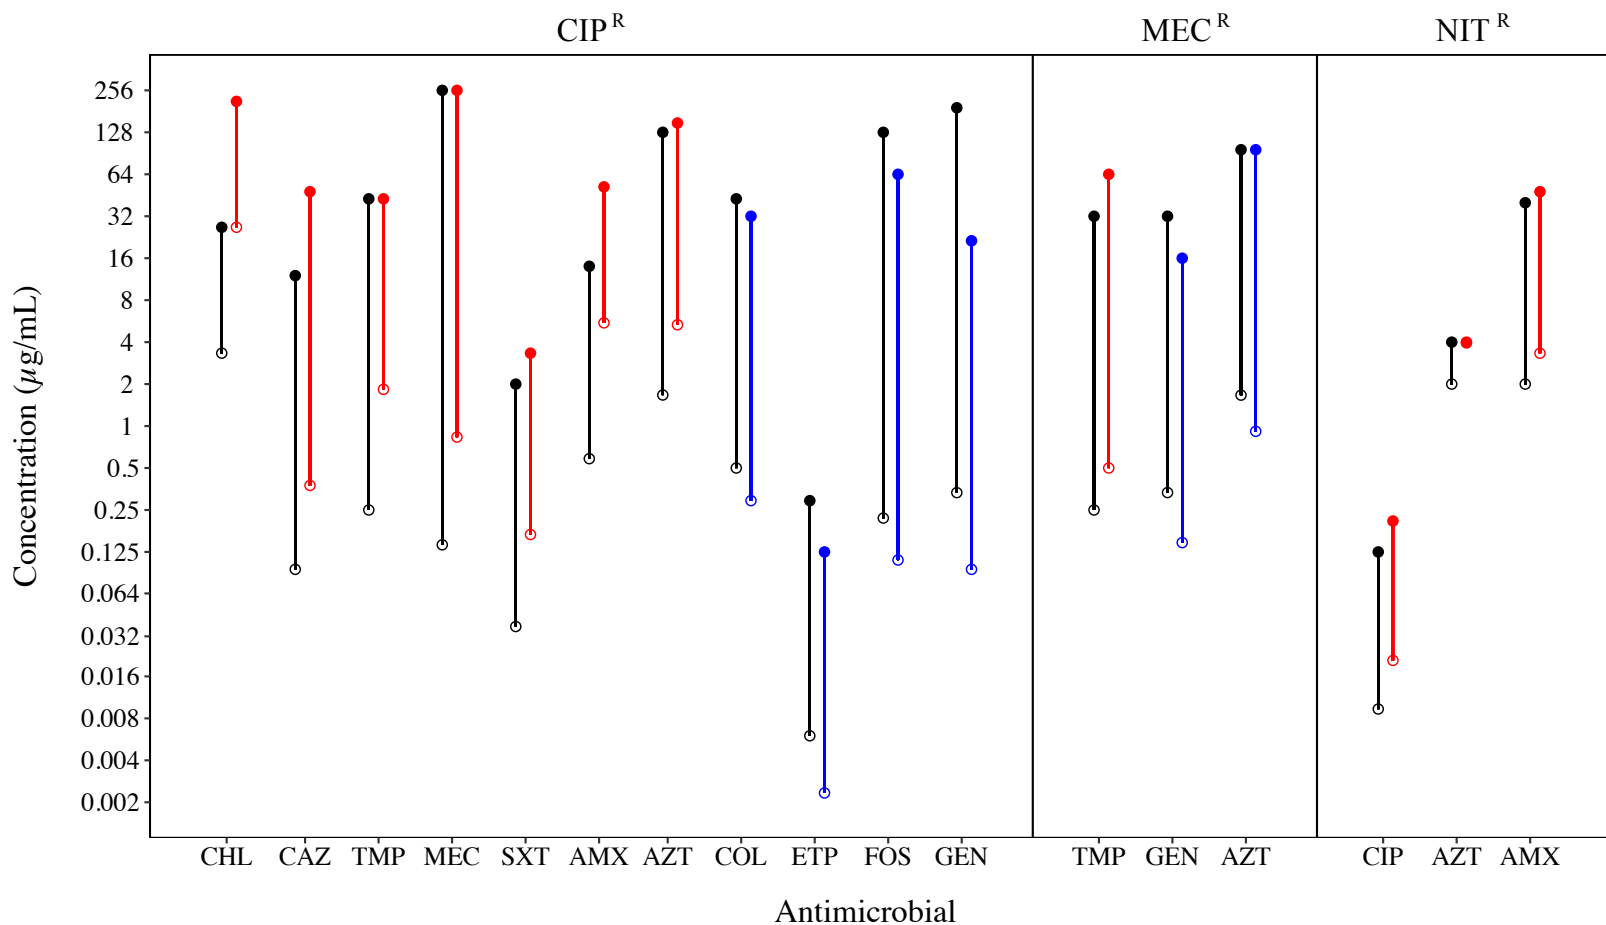

**Figure 3. Summary of changes in IC<sub>90</sub> and MPC results for representative strain:drug combinations.** The average IC<sub>90</sub> (open circles) and average mutation prevention concentration (MPC; filled circles) were determined and compared between AMR mutants (colored) with collateral responses, either CS (blue) or CR (red), and their respective wild-type strain (WT; black) in strain:drug

combinations representing conserved collateral responses. The range between the  $IC_{90}$  and MPC was considered the mutation selection window (MSW; lines). K56-16 NIT<sup>R</sup> had equivalent  $IC_{90}$  and MPC values for AZT, thus no MSW was reported. Generally, changes in MPC values reflected observed  $IC_{90}$  changes, shifting the MSW upwards or downwards accordingly. In 8/10 tested combinations an increase in  $IC_{90}$  value (CR) from WT to AMR mutant correlated with at least a small increased MPC, with the remaining combinations showing no change in MPC value between the WT and AMR mutant. Similarly, decreased  $IC_{90}$  values (CS) correlated with decreased MPCs (5/7).



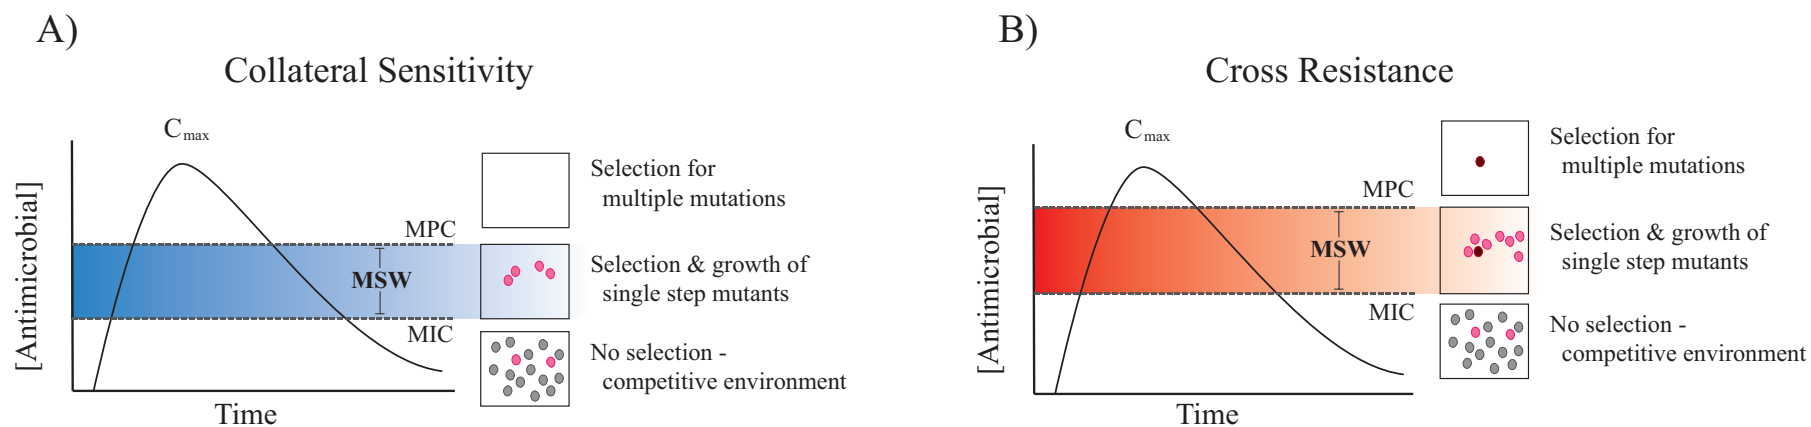

**Figure 4: Graphical presentation of the potential effects of CS and CR on the MSW.** Sequential drug administration informed by CS could potentially narrow or shift the MSW downwards in concentration space (left panel) whereas CR results in a widened or shifted upwards MSW (right panel). This would affect the probability of acquiring second step mutations leading to high-level resistance. Consequently, CS informed secondary therapies could reduce selection and thus propagation of first step mutants resulting in a reduced window of opportunity for second step mutations to occur. Dots represent bacteria resistant to a primary antibiotic (grey), spontaneous mutants with reduced susceptibility to a secondary drug (pink), or those with high-level resistance to the secondary drug (dark red).
